1 **Prevalence and Factors Associated with Cryptosporidiosis Among Livestock and Dogs in**  
2 **Kasese District, Uganda: A Cross-Sectional Study**

3 \*Clovice Kankya<sup>1</sup>, Justine Okello<sup>1</sup>, James Natweta Baguma<sup>1,2</sup>, Rogers Wambi<sup>1,4</sup>, Lesley Rose  
4 Ninsiima<sup>1,2</sup>, Methodius Tubihemukama<sup>1</sup>, Christine Tricia Kulabako<sup>1</sup>, Musso Munyeme<sup>3</sup>, Sonja  
5 Hartnack<sup>5</sup>, Walter Okello<sup>1</sup>, James Bugeza<sup>6</sup>, James Muleme<sup>1,2</sup>

6 **Affiliations**

7 <sup>1</sup>Department of Biosecurity, Ecosystems and Veterinary Public Health, College of Veterinary  
8 Medicine, Animal Resources and Biosecurity, Makerere University, P.O BOX 7062 Kampala,  
9 Uganda

10 <sup>2</sup>Department of Disease Control and Environmental Health, School of Public Health, Makerere  
11 University P.O BOX 7072 Kampala, Uganda

12 <sup>3</sup>Department of Disease control, School of Veterinary Medicine, University of Zambia, P.O BOX  
13 32379, Lusaka Zambia

14 <sup>4</sup>Department of Clinical Laboratory Mulago National Referral Hospital P.O Box 7051 Kampala,  
15 Uganda

16 <sup>5</sup>Section of Epidemiology, University of Zurich, Switzerland.

17 <sup>6</sup> National Agricultural Research Organisation/ National Livestock Resources Research Institute,  
18 P.O BOX, 5704, Kampala, Uganda

19

20 \*Corresponding author; Clovice Kankya

21 Email: [clokankya@gmail.com](mailto:clokankya@gmail.com) Tel: +256-772545999

## 22 Abstract

23 **Background:** Cryptosporidiosis is a common cause of diarrheal disease in livestock and dogs, and  
24 it can result in significant economic losses due to decreased productivity and higher treatment  
25 costs. The cryptosporidiosis burden in livestock and dogs is largely unknown and underexploited.  
26 We designed a cross-sectional research study to determine the prevalence and factors associated  
27 with cryptosporidiosis in livestock and dogs.

28 **Methods:** The questionnaire data was downloaded from the Kobotoolbox server in excel format  
29 for cleaning and analysis. Laboratory results were matched with the questionnaire data and  
30 statistical analysis was performed using STATA version 14 and R version 4.2.2. Descriptive  
31 statistics were conducted to determine the frequencies, percentages, and proportions of the  
32 different study variables. For the categorical variables, 95% binomial and multinomial confidence  
33 intervals were obtained using the commands BinomCI(), with Jeffreys approach, and  
34 MultinomCI() available in the DescTools package. To adjust for potential clustering within  
35 household, a logistic mixed model approach with household as random effect was chosen and  
36 performed using the package glmmTMB. The outcome was a positive or negative test result of  
37 each dog. A likelihood ratio test using the lmttest package was used to determine if a predictor was  
38 significantly associated with the outcome. To adjust for multiple comparisons, the multcomp  
39 package with Tukeys approach was used. First all variables were included in a univariable  
40 approach. Second all variables with p-values <0.2 were included in a multivariable model..

41 **Results:** Dogs were over 50times more likely to have the cryptosporidium infection compared to goat.  
42 With aOR 56.07, 95%CI= [10.2569,306.5307] and p-value <0.001. Furthermore, being of Mukonjo tribe  
43 was over 20times more likely to have cryptosporidiosis compared to being Musongora. At aOR 24.92,  
44 95%CI= [3.6971,168.0655], p-value 0.0010. Additionally, persons who drunk water from the river ponds  
45 were 76.93 times more likely to have cryptosporidium infection compared to the counterparts whose source  
46 of drinking water were from protected sources with aOR 76.93, 95% CI= [3.71,1595.324] p-value= 0.0050.

47 **Conclusion:** Cryptosporidiosis still remains a big public health problem in Kasese District. Dogs  
48 are more at risk of having cryptosporidiosis whereas drinking from river ponds was highly  
49 attributed to acquiring cryptosporidiosis.

50

## 51 **Introduction**

52 Cryptosporidiosis is a diarrheal disease caused by the parasite *Cryptosporidium*. It is found  
53 worldwide and can affect a variety of animals, including humans, livestock, and pets (Pumipuntu  
54 & Piratae, 2018 and Ramirez et al., 2004). *Cryptosporidium* is more prevalent in developing  
55 countries (5% or higher) than in developed countries (3% or less) (Starkey et al., 2006). In humans,  
56 the disease is typically transmitted through the ingestion of contaminated food or water or through  
57 close contact with infected individuals or animals (Barnes et al., 2017 and Ganter, 2015). It can  
58 cause symptoms such as diarrhea, abdominal cramps, and dehydration, which can be particularly  
59 severe in people with weakened immune systems, such as those with HIV/AIDS or cancer (Xiao  
60 & Griffiths, 2020). Recently, there has been a documented increase in opportunistic infections and  
61 risk of acquiring opportunistic cryptosporidium infections in humans with HIV/AIDS patients and  
62 other co-morbidities in Kasese district (Kankya et al., 2022).

63 In livestock, cryptosporidiosis can lead to weight loss, reduced milk production, and decreased  
64 growth rates, all of which can have significant economic impacts for farmers. The disease can also  
65 be transmitted to humans through the consumption of contaminated meat or milk.  
66 Cryptosporidiosis can affect a variety of animal species, including cattle, sheep, goats, pigs, dogs  
67 and poultry (Smith et al., 2021). Dogs can be infected with *Cryptosporidium* and may shed the  
68 parasite in their faeces, which can contaminate the environment and potentially transmit the  
69 infection to humans (Ahmed et al., 2021).

70 In Uganda, cryptosporidiosis in calves and lambs are considered as the main source for human  
71 cryptosporidiosis, like in other low-income countries. With the increasing number of farming  
72 systems in Kasese district and Uganda at large, cryptosporidiosis in livestock is becoming a  
73 significant problem for animal health (both subclinical and clinical) and economic losses because  
74 of increasing need for veterinary services and labor costs due to increasing animal health-care cost  
75 with ultimate decreased growth rate of animals and mortality associated with severely affected  
76 animals. It is important to note that *Cryptosporidium* oocysts excreted faeces from infected farm  
77 animals, particularly calves, can be a source of human infection and may have a great influence on  
78 public health (Starkey et al., 2006). The habitual occurrence of floods in Kasese district also  
79 increases the risk of transmission of cryptosporidium among humans and animals. Flood water can  
80 contain sewage and other contaminants that may be contaminated with *Cryptosporidium* oocysts

81 that when humans and animals encounter, they may become infected with the parasite. In addition,  
82 flooding can disrupt water treatment and distribution systems, leading to the contamination of  
83 drinking water with *Cryptosporidium* oocysts. Flooding can also lead to the displacement of people  
84 and their animals, which can increase the risk of disease transmission through overcrowding and  
85 a lack of proper hygiene facilities. All these scenarios have been document in Kasese district  
86 (Boyce et al., 2016), hence a strong justification for selecting the study area.

87 Despite several infection control efforts such as increasing access to clean water and improving  
88 the quality of water sources, improving hygiene and sanitation, treating, and preventing  
89 malnutrition, *Cryptosporidium* infection remains a huge challenge in Kasese district of Uganda.  
90 Unfortunately, there has been no published information on the epidemiology of cryptosporidium  
91 infection in this area. This study therefore sought to fill the knowledge gap by determining the  
92 prevalence and factors associated with cryptosporidium in livestock and dogs in Kasese district.

## 93 **Materials and methods**

### 94 **Study design**

95 The study employed a cross-sectional study design with multistage sampling. It was conducted in  
96 Kasese district in Western Uganda from September 2019 to February 2020. The study was  
97 conducted among households with livestock and dogs.

### 98 **Sample size determination**

99 Sample size determination was based on the previous studies on prevalence and associated risk  
100 factors in the East African region (Tombang et al., 2019). Based on the simple assumption that an  
101 absolute minimum of 50 domestic animals with cryptosporidium infection in the study population,  
102 we opted for 733 as a necessary minimum sample size, enabling also a reliable comparison  
103 between population factors at a prevalence of 20% Ausvet Epitools (Sergeant, 2018). With the  
104 existing logistics, facilities and specified period, a total of 89 household heads were interviewed  
105 and a total of 785 animal faecal samples were collected from three Karusandara, Katwe-Kabatooro  
106 town council and Lake Katwe Sub-county respectively.

### 107 **Study area and study population**

108 The study was carried out in Kasese district of Uganda. Kasese is in the western region of Uganda,  
109 bordering Bunyangabu District in the East, Kitagwenda in the Southeast by Lake George, Rubirizi  
110 District in the South, the West by the Democratic Republic of Congo and Bundibugyo District in the  
111 North. Administratively, Kasese district is comprised of 27 Sub-Counties, 14 Town Councils, 1  
112 Municipality with 3 Divisions. It has two vast counties of Bukonzo and Busongora with 5  
113 Constituencies. It lies between latitudes 0° 12'S and 0° 26'N; longitudes 29° 42'E and 30° 18'E  
114 (Karyeija & Kahika, 2017). Kasese district has a population of 694,987 people and a total of 139,406  
115 households (UBOS, 2016). Kasese is a multi-ethnic district with many people of different ethnic  
116 backgrounds. The main languages and ethnic groups that dominate the area are the Bakonzo,  
117 Basongora, Banyabindi, Batooro, Banyankole, and Bakiga respectively. The district is predominantly  
118 agricultural with livelihoods relying mainly on farming. The inhabitants also carry out fishing and  
119 trading.

120 The district has a considerably high animal population, estimated at 101,453 cattle, 300,518 goats  
121 (Benson & Mugarura, 2013). Majority of the farmers keep cattle, goats and dogs with close  
122 interaction which is a significant risk factor for transmission of various disease agents including  
123 cryptosporidium among the susceptible hosts.

124 *Figure 1; showing the study area*

125

## 126 **Sampling strategy and study participants recruitment**

127 Our study used a multi staged sampling approach where sub counties, parishes, and villages were  
128 randomly selected using a random number generator. Karusandara, Katwe-Kabatooro town  
129 council and Lake Katwe Sub-county were selected for this study. For the household selection, we  
130 used a passive sampling method based on the presence of livestock. The recruitment team included  
131 a local veterinarian, research assistant, and a member of the local council from the study site. From  
132 each selected household, we sampled all the cattle, goats, and dogs present.

## 133 **Faecal sample collection**

134 Faecal samples were collected from the rectum of goats, cattle, and dogs using sterile arm-length  
135 gloves. Faecal sample collection was conducted by a trained veterinarian attached to the study site.

136 The samples were placed in sterile ziplock bags and stored at -4 degree celsius until they could be  
137 transported in cool box containing ice packs to the microbiology laboratory at the College of  
138 Veterinary Medicine, Animal Resources and Biosecurity. The samples were handled with care to  
139 ensure their integrity and maintain the accuracy of the results.

#### 140 **Questionnaire data collection**

141 To gather information on household, animals, and key activity characteristics, we administered  
142 pre-tested semi-structured questionnaires to the heads of households. The questionnaire designed  
143 in an online platform (Kobotoolbox) was used to collect data on a variety of factors, including the  
144 social demographic characteristics of the household heads, livestock husbandry practices, the  
145 sources of water used by both humans and animals, and the livestock treatment practices employed  
146 by the households. To ensure the accuracy and reliability of the collected data, these questionnaires  
147 were developed based on a review of relevant literature and with input from experts in the field  
148 and were pre-tested in Muhokya Sub-county in the same district before being used for final data  
149 collection. In addition to collecting data from the households, we also obtained data on the  
150 individual animals from which faecal samples were collected using an animal characteristics  
151 checklist. These two sets of data were later merged during the data curation and analysis process  
152 to provide a comprehensive overview of the study population and the factors associated with the  
153 presence of cryptosporidium.

#### 154 **Laboratory procedures**

##### 155 **Sample reception**

156 Upon arriving at the laboratory, the samples were assigned laboratory identification numbers and  
157 entered to the sample registry. To ensure accurate analysis, only samples that met certain criteria  
158 were accepted. These criteria included proper labeling, leak-proof containers, appropriate sample  
159 volumes, clean sample collection containers, and relevant sample information. Any samples that  
160 did not meet these requirements were immediately rejected and recorded in sample rejection forms

##### 161 **Sample analysis**

162 Faecal samples were processed for Cryptosporidium detection using the modified Ziehl-Neelsen  
163 (MZN) staining technique (Tombang et al., 2019). Briefly, a direct faecal smear was prepared on

164 a clean, grease-free glass slide and allowed to air dry. The smear was then flooded with methanol  
165 for five minutes, air-dried, and briefly flame-fixed. The slide was then flooded with concentrated  
166 Carbol fuchsin and allowed to stain for 40 minutes. After washing with running tap water for 5  
167 minutes, the slide was decolorized using 10% Sulfuric acid for 15 seconds and washed again with  
168 running tap water. The slide was counter stained with 5% Malachite green for 5 minutes, washed  
169 with running tap water for 5 minutes, and allowed to air dry. The slide was then examined under  
170 a light microscope at x40 and x100 magnification for the presence of *Cryptosporidium* oocysts.

### 171 **Data analysis and management**

172 The questionnaire data was downloaded from the Kobotoolbox server in excel format for cleaning  
173 and analysis. Laboratory results were matched with the questionnaire data and statistical analysis  
174 was performed using STATA version 14 and R version 4.2.2. Descriptive statistics were conducted  
175 to determine the frequencies, percentages, and proportions of the different study variables. For the  
176 categorical variables, 95% binomial and multinomial confidence intervals were obtained using the  
177 commands BinomCI(), with Jeffreys approach, and MultinomCI() available in the DescTools  
178 package. To adjust for potential clustering within household, a logistic mixed model approach with  
179 household as random effect was chosen and performed using the package glmmTMB. The  
180 outcome was a positive or negative test result of each dog. The predictor variables included:

181 A likelihood ratio test using the lmtest package was used to determine if a predictor was  
182 significantly associated with the outcome. To adjust for multiple comparisons, the multcomp  
183 package with Tukeys approach was used.

184 First all variables were included in a univariable approach. Second all variables with p-values <0.2  
185 were included in a multivariable model.

### 186 **Quality control and assurance**

187 All samples were verified to confirm the labeling, type, adequate volume, and integrity at the  
188 laboratory. A trained veterinarian collected animal faecal samples during sample and data  
189 collection. The sample containers were labelled with the unique codes that represented the  
190 household and animal type. All the samples were handled as highly infectious and personal  
191 protective equipment were used all times whenever any activity was to take place on the samples.

192 **Results**

193 The study recruited 89 households in Kasese district, from which livestock were selected and  
194 questionnaires were administered. Specifically, 32, 16 and 41 households were in Karusandara,  
195 Katwe-Kabatooro town council and Lake Katwe Sub- County respectively.

196 **Table 1. showing Household characteristics of study respondents**

197 In the present study, 34.38% of the female animals were positive for the cryptosporidium infection  
198 unlike the male counterpart in whom the prevalence of cryptosporidiosis is 44.26%. Among the  
199 animals that showed signs of the disease, 32.9% had cryptosporidium infection. The prevalence of  
200 cryptosporidium infection was 41.82% among animals that were not treated for helminth unlike their  
201 counterparts that were treated for treated that had 14.76%.

202 **Prevalence of cryptosporidium**

203 Overall prevalence of Cryptosporidium in Livestock and dogs in Kasese district was 36.7%  
204 (288/784). Specifically, the prevalence was 72.0% (18/25), 39.3% (217/552) and 25.5% (53/208)  
205 in Dogs, Cattle, and Goats respectively as shown in figure 2 below.

206 **Figure2: Showing prevalence of cryptosporidiosis in dogs, cattle, and goats**

207

208 **Risk factors associated with the prevalence of cryptosporidiosis**

209 For the herd factors, Male animals were 1.47 times more likely to have cryptosporidiosis compared  
210 to the female counter parts. At aOR 1.4747, 95%CI= [0.8214,2.6473] and p-value 0.19, this association  
211 was however not statistically significant. Also, dogs were over 50times more likely to have the  
212 cryptosporidium infection compared to goat. With aOR 56.07, 95%CI= [10.2569,306.5307] and p-value  
213 <0.001; this association was statistically significant. Young animals were 1.03 times more likely to have  
214 cryptosporidiosis compared to their adult counterparts. At aOR 1.038, 95%CI= [0.5776,1.8654] and p-value  
215 0.90; this association was however not statistically significant.

216 Furthermore, for human factors; being of Mukonjo tribe was over 20times more likely to have  
217 cryptosporidiosis compared to being Musongora. At aOR 24.92, 95%CI= [3.6971,168.0655], this  
218 association was statistically significant at p-value 0.0010. in addition, for water factors persons who drunk  
219 water from the river ponds were 76.93 times more likely to have cryptosporidium infection compared to



220 the counterparts whose source of drinking water were from protected sources. At aOR 76.93, 95% CI=  
221 [3.71,1595.324], this association was statistically significant at p-value 0.0050.

222 **Table 2: Showing the risk factors associated with the cryptosporidium infection**

223

224 **Discussion**

225 The present study focused on the diagnosis of *Cryptosporidium* spp. in livestock and dogs in the  
226 farming rural community set-up using modified Ziehl–Neelsen technique. The overall prevalence  
227 of *Cryptosporidium* in this study was 36.7% and this was much lower than the 70 % prevalence  
228 reported by (Romero-Salas et al., 2016). On the other hand, the current study reported a high  
229 prevalence than the 16% prevalence reported in Tanzania by Mtambo et al. The high prevalence  
230 reported in the present could have been attributed to the fact that most of the animals sampled in  
231 this study were kept under free range system. This system is predominant in agro-pastoral  
232 communities and has been linked to increased risk of exposure of animals to infectious agents  
233 including cryptosporidium (Nakayima et al., 2019). The current study revealed highest prevalence  
234 of cryptosporidium in dogs followed by goats and least in Cattle. This trend could be associated  
235 with different exposure levels among the animal species in the study. The highest prevalence in  
236 dogs in this study could be attribute to the fact that most of the dogs kept in this area are freely  
237 roaming and to some extent are likely to cross to the neighboring Queen Elizabeth national park  
238 which increases risk of exposure to infectious pathogens (Kankya *et al.*, 2022).

239 Our present study reveals that male animals are more likely to have cryptosporidium compared to  
240 their female counterpart. Our study is in disagreement with a study by (Li *et al.*, 2022) that reported  
241 a higher global prevalence and risk factors for cryptosporidium in female equus compared to the  
242 male. The high likelihood of the male animals having cryptosporidiosis in our study could be  
243 attributed to their behaviors like reproduction among others that provides fertile environment for  
244 the pathogens to attach onto the animal. For example, the male animals often mounts many female  
245 other animals and also grazes sometimes far from the grazing field which further exposures them  
246 to come into contact with infectious pathogens like cryptosporidium.

247 Furthermore, our study revealed that animals which drink water from river ponds were more likely  
248 to have cryptosporidium infection compared to those which drink water from protected springs  
249 and rainwater/valley dams. Our study is in perfect agreement with the study conducted by (Khan

250 et al., 2019) who found that surface waters such as springs, river ponds among others are at higher  
251 risk of spreading cryptosporidium pathogen. It is imperative to note that such surface waters in the  
252 study area are likely to act as wallowing grounds for both domestic animals and wild animals  
253 which ultimately increase the risk of infection spread to those animals that come to drink such  
254 waters. Also, the high risk of acquiring cryptosporidium in this study could be attributed to the fact  
255 that protected springs and valley dams provides an optimum environment for the survival and  
256 multiplication of the cryptosporidium pathogen. This therefore is easily picked by the animals that  
257 encounters such waters during the drinking process. Also, the low risk of the protected waters in  
258 the spread of cryptosporidium infection to the animals in our study could be attributed the fact that  
259 such waters are always highly protected from almost all infectious pathogens that can infect  
260 animals and humans. And this stops other infectious pathogens from taking advantage of such  
261 water sources.

262 Our study further shows that animals that were regularly treated for the helminth infestations were  
263 at low risk of acquiring the cryptosporidium infection. Our finding is in agreement with a study by  
264 (Liao et al., 2020) who indicated that deworming was a protective factor against cryptosporidiosis.  
265 This could be attributed to the fact that different antihelminth drugs that are often administered to  
266 the animals exerts a static (limiting growth) and/or cidal (killing) effects on the cryptosporidium  
267 pathogen. The antihelminth treatment thus reduces the risk of the cryptosporidiosis in livestock  
268 and dogs.

269 Also, the animal in the present study, that presented with other underlying ailment were more  
270 likely to be infected with cryptosporidium. This finding were in agreement with a study carried  
271 out by (Ebiyo & Haile, 2022). This could be explained by the fact that underlying ailment has  
272 immunity lowering effect that paves way for establishment of cryptosporidium infection.  
273 Therefore, animals with underling ailment should be investigated and treated for cryptosporidium  
274 infection.

275 Our study acknowledges the limitations experienced during the execution of this study.  
276 Specifically, the distance between the diagnostic laboratory and study area may have affected the  
277 viability of cryptosporidium oocysts in samples with low faecal parasites hence undetectable and  
278 the observed prevalence. Also, we could not confirm the species and genotypes of  
279 *Cryptosporidium* based on the method employed in this study.

## 280 **Conclusion**

281 The presents study indicates a high prevalence of cryptosporidiosis in Kasese district. The  
282 prevalence was further different cross the animal species examined with Dogs having the highest  
283 prevalence, followed by Cattle and goats. Being of male gender in the animals, drinking water  
284 from river ponds as well as the age (young) of the animals were associated with the risk of  
285 cryptosporidiosis infection. Regularly treating the animals for helminth infestation was a  
286 protective factor against cryptosporidiosis infection.

## 287 **Recommendations**

- 288 • More efforts such as fencing of the surface water sources like spring waters should be  
289 effectuated to reduce the risk of exposure of the cryptosporidium infection at the Animal-  
290 Human-Environment interface.
- 291 • Also, community animal owners should take initiatives to frequently treat intestinal  
292 infestations on their livestock and dogs such as deworming. This can be done by using both  
293 conventional drugs as well as locally available (herbal concoctions) therapy
- 294 • Furthermore, community members should always practice optimum hygiene such as hand  
295 washing, proper disposal of faecal matter as sustainable approach to prevention and control  
296 of cryptosporidiosis spread at the animal-human-environment interface.
- 297 • Additionally, all the concerned stakeholders including government, private sectors,  
298 farmers, academia among others will need to work together to improve the quality of  
299 animal husbandry practices within the agro-pastoral communities

## 300 **Data availability statement**

301 The data used in the generations of this manuscript will be made available to any individual upon  
302 request.

## 303 **Ethical approval**

304 The authors sought ethical clearance and the research protocol was approved by the research ethics  
305 committee at the Makerere University School of Biosecurity, Biotechnical and Laboratory  
306 Sciences (SBLS) and the Uganda National Council for Science and Technology (UNCST) - (NS  
307 640). The study participants provided their written informed consent to participate in this study.

308 We also followed the declaration of the Helsinki guidance on ethical principles involving humans  
309 subjects in this study.

### 310 **Funding**

311 The financial support used in this study was duly from the NORHED 1 funded project  
312 CAPAZOMANINTECO

### 313 **Conflict of interest**

314 The authors declare that the research was conducted in the absence of any commercial or financial  
315 relationships that could be construed as a potential conflict of interest.

### 316 **Acknowledgments**

317 The authors extend sincere appreciations to the reviewers and editors of this manuscript to ensure  
318 its publication. Also, special thanks goes to the research assistants who worked tirelessly hard to  
319 support the data, and sample collection during the execution of this research study. We also thank  
320 the government of NORWAY, through the NORHED I programme that provided financial support  
321 used in this study.

322

323

324

### 325 **References**

326 Ahmed, F., Cappai, M. G., Morrone, S., Cavallo, L., Berlinguer, F., Dessi, G., Tamponi, C.,  
327 Scala, A., & Varcasia, A. (2021). Raw meat based diet (RMBD) for household pets as  
328 potential door opener to parasitic load of domestic and urban environment. Revival of  
329 understated zoonotic hazards? A review. *One Health*, *13*, 100327.

330 Barnes, A. N., Davaasuren, A., Baasandagva, U., & Gray, G. C. (2017). A systematic review of  
331 zoonotic enteric parasitic diseases among nomadic and pastoral people. *PloS One*, *12*(11),  
332 e0188809.

333 Benson, T., & Mugarura, S. (2013). Livestock development planning in Uganda: Identification

- 334 of areas of opportunity and challenge. *Land Use Policy*, 35, 131–139.
- 335 Boyce, R., Reyes, R., Matte, M., Ntaro, M., Mulogo, E., Metlay, J. P., Band, L., & Siedner, M. J.  
336 (2016). Severe flooding and malaria transmission in the western Ugandan Highlands:  
337 implications for disease control in an era of global climate change. *The Journal of Infectious*  
338 *Diseases*, 214(9), 1403–1410.
- 339 Ebiyo, A., & Haile, G. (2022). Prevalence and Factors Associated with Cryptosporidium  
340 Infection in Calves in and around Nekemte Town, East Wollega Zone of Ethiopia.  
341 *Veterinary Medicine International*, 2022. <https://doi.org/10.1155/2022/1468242>
- 342 Ganter, M. (2015). Zoonotic risks from small ruminants. *Veterinary Microbiology*, 181(1–2),  
343 53–65.
- 344 Kankya, C., Okello, J., Wambi, R., Ninsiima, L. R., Tubihemukama, M., Kulabako, C. T.,  
345 Asaba, R., Baguma, J. N., Munyeme, M., & Muleme, J. (2022). Utilization of health belief  
346 model in comprehending diarrheal disease dynamics: a case of cryptosporidiosis in Uganda.  
347 *BMC Public Health*, 22(1), 1–8.
- 348 Karyeija, G., & Kahika, G. (2017). Institutional roles and the implementation of local economic  
349 development, Kasese District, Uganda. *Africa's Public Service Delivery and Performance*  
350 *Review*, 5(1), 1–9.
- 351 Khan, A., Shams, S., Khan, S., Khan, M. I., Khan, S., & Ali, A. (2019). Evaluation of prevalence  
352 and risk factors associated with Cryptosporidium infection in rural population of district  
353 Buner, Pakistan. *PLoS One*, 14(1), e0209188.
- 354 Li, X.-M., Geng, H.-L., Wei, Y.-J., Yan, W.-L., Liu, J., Wei, X.-Y., Zhang, M., Wang, X.-Y.,  
355 Zhang, X.-X., & Liu, G. (2022). Global prevalence and risk factors of Cryptosporidium  
356 infection in Equus: A systematic review and meta-analysis. *Frontiers in Cellular and*  
357 *Infection Microbiology*, 12, 1774.
- 358 Liao, S., Lin, X., Sun, Y., Qi, N., Lv, M., Wu, C., Li, J., Hu, J., Yu, L., & Cai, H. (2020).  
359 Occurrence and genotypes of Cryptosporidium spp., Giardia duodenalis, and Blastocystis  
360 sp. in household, shelter, breeding, and pet market dogs in Guangzhou, southern China.  
361 *Scientific Reports*, 10(1), 1–11.

- 362 Nakayima, J., Arinaitwe, E., Kabasa, W. M., Kasaija, P. D., Agbemelo-Tsomafo, C., &  
363 Omotoriogun, T. C. (2019). *Phylogeny and prevalence of haemosporidian parasites of free-*  
364 *ranging domestic birds in Northwestern Uganda.*
- 365 Pumipuntu, N., & Piratae, S. (2018). Cryptosporidiosis: A zoonotic disease concern. *Veterinary*  
366 *World, 11(5)*, 681.
- 367 Ramirez, N. E., Ward, L. A., & Sreevatsan, S. (2004). A review of the biology and epidemiology  
368 of cryptosporidiosis in humans and animals. *Microbes and Infection, 6(8)*, 773–785.
- 369 Romero-Salas, D., Alvarado-Esquivel, C., Cruz-Romero, A., Aguilar-Domínguez, M., Ibarra-  
370 Priego, N., Merino-Charrez, J. O., Pérez de León, A. A., & Hernández-Tinoco, J. (2016).  
371 Prevalence of Cryptosporidium in small ruminants from Veracruz, Mexico. *BMC*  
372 *Veterinary Research, 12(1)*, 1–6. <https://doi.org/10.1186/S12917-016-0638-3/TABLES/1>
- 373 Sergeant, E. S. G. (2018). Epitools epidemiological calculators. *Ausvet Pty Ltd.*
- 374 Smith, R. P., Newton, K., Rimdap, E., Wight, A., Robinson, G., & Chalmers, R. M. (2021).  
375 Review of investigations of premises housing animals that were linked to human outbreaks  
376 of cryptosporidiosis in England and Wales between 2009 and 2019. *Veterinary Record,*  
377 *189(4)*, no-no.
- 378 Starkey, S. R., Kimber, K. R., Wade, S. E., Schaaf, S. L., White, M. E., & Mohammed, H. O.  
379 (2006). Risk Factors Associated with Cryptosporidium Infection on Dairy Farms in a New  
380 York State Watershed. *Journal of Dairy Science, 89(11)*, 4229–4236.  
381 [https://doi.org/10.3168/jds.S0022-0302\(06\)72468-7](https://doi.org/10.3168/jds.S0022-0302(06)72468-7)
- 382 Statistics, U. B. O. (2016). The national population and housing census 2014-main report.  
383 *Kampala: Uganda Bureau of Statistics.*
- 384 Tombang, A. N., Ambe, N. F., Bobga, T. P., Nkfusai, C. N., Collins, N. M., Ngwa, S. B.,  
385 Diengou, N. H., & Cumber, S. N. (2019). Prevalence and risk factors associated with  
386 cryptosporidiosis among children within the ages 0–5 years attending the Limbe regional  
387 hospital, southwest region, Cameroon. *BMC Public Health, 19(1)*, 1–10.
- 388 Xiao, L., & Griffiths, J. K. (2020). Cryptosporidiosis. In *Hunter's Tropical Medicine and*  
389 *Emerging Infectious Diseases* (pp. 712–718). Elsevier.

- 390 Ahmed, F., Cappai, M. G., Morrone, S., Cavallo, L., Berlinguer, F., Dessì, G., Tamponi, C.,  
391 Scala, A., & Varcasia, A. (2021). Raw meat based diet (RMBD) for household pets as  
392 potential door opener to parasitic load of domestic and urban environment. Revival of  
393 understated zoonotic hazards? A review. *One Health*, *13*, 100327.
- 394 Barnes, A. N., Davaasuren, A., Baasandagva, U., & Gray, G. C. (2017). A systematic review of  
395 zoonotic enteric parasitic diseases among nomadic and pastoral people. *PloS One*, *12*(11),  
396 e0188809.
- 397 Benson, T., & Mugarura, S. (2013). Livestock development planning in Uganda: Identification  
398 of areas of opportunity and challenge. *Land Use Policy*, *35*, 131–139.
- 399 Boyce, R., Reyes, R., Matte, M., Ntaro, M., Mulogo, E., Metlay, J. P., Band, L., & Siedner, M. J.  
400 (2016). Severe flooding and malaria transmission in the western Ugandan Highlands:  
401 implications for disease control in an era of global climate change. *The Journal of Infectious*  
402 *Diseases*, *214*(9), 1403–1410.
- 403 Ebiyo, A., & Haile, G. (2022). Prevalence and Factors Associated with Cryptosporidium  
404 Infection in Calves in and around Nekemte Town, East Wollega Zone of Ethiopia.  
405 *Veterinary Medicine International*, 2022. <https://doi.org/10.1155/2022/1468242>
- 406 Ganter, M. (2015). Zoonotic risks from small ruminants. *Veterinary Microbiology*, *181*(1–2),  
407 53–65.
- 408 Kankya, C., Okello, J., Wambi, R., Ninsiima, L. R., Tubihemukama, M., Kulabako, C. T.,  
409 Asaba, R., Baguma, J. N., Munyeme, M., & Muleme, J. (2022). Utilization of health belief  
410 model in comprehending diarrheal disease dynamics: a case of cryptosporidiosis in Uganda.  
411 *BMC Public Health*, *22*(1), 1–8.
- 412 Karyeija, G., & Kahika, G. (2017). Institutional roles and the implementation of local economic  
413 development, Kasese District, Uganda. *Africa's Public Service Delivery and Performance*  
414 *Review*, *5*(1), 1–9.
- 415 Khan, A., Shams, S., Khan, S., Khan, M. I., Khan, S., & Ali, A. (2019). Evaluation of prevalence  
416 and risk factors associated with Cryptosporidium infection in rural population of district  
417 Buner, Pakistan. *PLoS One*, *14*(1), e0209188.

- 418 Li, X.-M., Geng, H.-L., Wei, Y.-J., Yan, W.-L., Liu, J., Wei, X.-Y., Zhang, M., Wang, X.-Y.,  
419 Zhang, X.-X., & Liu, G. (2022). Global prevalence and risk factors of Cryptosporidium  
420 infection in Equus: A systematic review and meta-analysis. *Frontiers in Cellular and*  
421 *Infection Microbiology*, *12*, 1774.
- 422 Liao, S., Lin, X., Sun, Y., Qi, N., Lv, M., Wu, C., Li, J., Hu, J., Yu, L., & Cai, H. (2020).  
423 Occurrence and genotypes of Cryptosporidium spp., Giardia duodenalis, and Blastocystis  
424 sp. in household, shelter, breeding, and pet market dogs in Guangzhou, southern China.  
425 *Scientific Reports*, *10*(1), 1–11.
- 426 Nakayima, J., Arinaitwe, E., Kabasa, W. M., Kasaija, P. D., Agbemelo-Tsomafo, C., &  
427 Omotoriogun, T. C. (2019). *Phylogeny and prevalence of haemosporidian parasites of free-*  
428 *ranging domestic birds in Northwestern Uganda*.
- 429 Pumipuntu, N., & Piratae, S. (2018). Cryptosporidiosis: A zoonotic disease concern. *Veterinary*  
430 *World*, *11*(5), 681.
- 431 Ramirez, N. E., Ward, L. A., & Sreevatsan, S. (2004). A review of the biology and epidemiology  
432 of cryptosporidiosis in humans and animals. *Microbes and Infection*, *6*(8), 773–785.
- 433 Romero-Salas, D., Alvarado-Esquivel, C., Cruz-Romero, A., Aguilar-Domínguez, M., Ibarra-  
434 Priego, N., Merino-Charrez, J. O., Pérez de León, A. A., & Hernández-Tinoco, J. (2016).  
435 Prevalence of Cryptosporidium in small ruminants from Veracruz, Mexico. *BMC*  
436 *Veterinary Research*, *12*(1), 1–6. <https://doi.org/10.1186/S12917-016-0638-3/TABLES/1>
- 437 Sergeant, E. S. G. (2018). Epitools epidemiological calculators. *Ausvet Pty Ltd*.
- 438 Smith, R. P., Newton, K., Rimdap, E., Wight, A., Robinson, G., & Chalmers, R. M. (2021).  
439 Review of investigations of premises housing animals that were linked to human outbreaks  
440 of cryptosporidiosis in England and Wales between 2009 and 2019. *Veterinary Record*,  
441 *189*(4), no-no.
- 442 Starkey, S. R., Kimber, K. R., Wade, S. E., Schaaf, S. L., White, M. E., & Mohammed, H. O.  
443 (2006). Risk Factors Associated with Cryptosporidium Infection on Dairy Farms in a New  
444 York State Watershed. *Journal of Dairy Science*, *89*(11), 4229–4236.  
445 [https://doi.org/10.3168/jds.S0022-0302\(06\)72468-7](https://doi.org/10.3168/jds.S0022-0302(06)72468-7)



- 446 Statistics, U. B. O. (2016). The national population and housing census 2014-main report.  
447 *Kampala: Uganda Bureau of Statistics.*
- 448 Tombang, A. N., Ambe, N. F., Bobga, T. P., Nkfusai, C. N., Collins, N. M., Ngwa, S. B.,  
449 Diengou, N. H., & Cumber, S. N. (2019). Prevalence and risk factors associated with  
450 cryptosporidiosis among children within the ages 0–5 years attending the Limbe regional  
451 hospital, southwest region, Cameroon. *BMC Public Health, 19*(1), 1–10.
- 452 Xiao, L., & Griffiths, J. K. (2020). Cryptosporidiosis. In *Hunter's Tropical Medicine and*  
453 *Emerging Infectious Diseases* (pp. 712–718). Elsevier.
- 454

## FIGURES

*Figure 1; showing the study area*

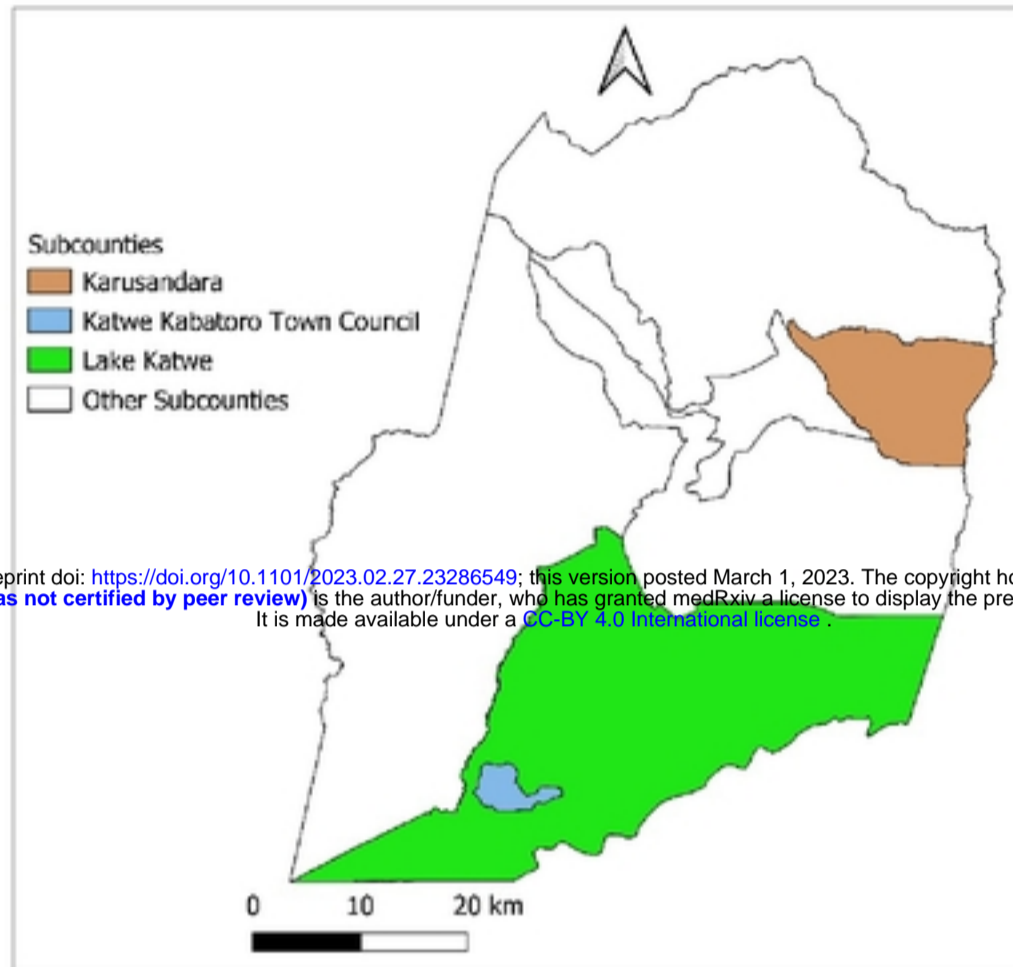

*Figure2: Showing prevalence of cryptosporidiosis in dogs, cattle, and goats*

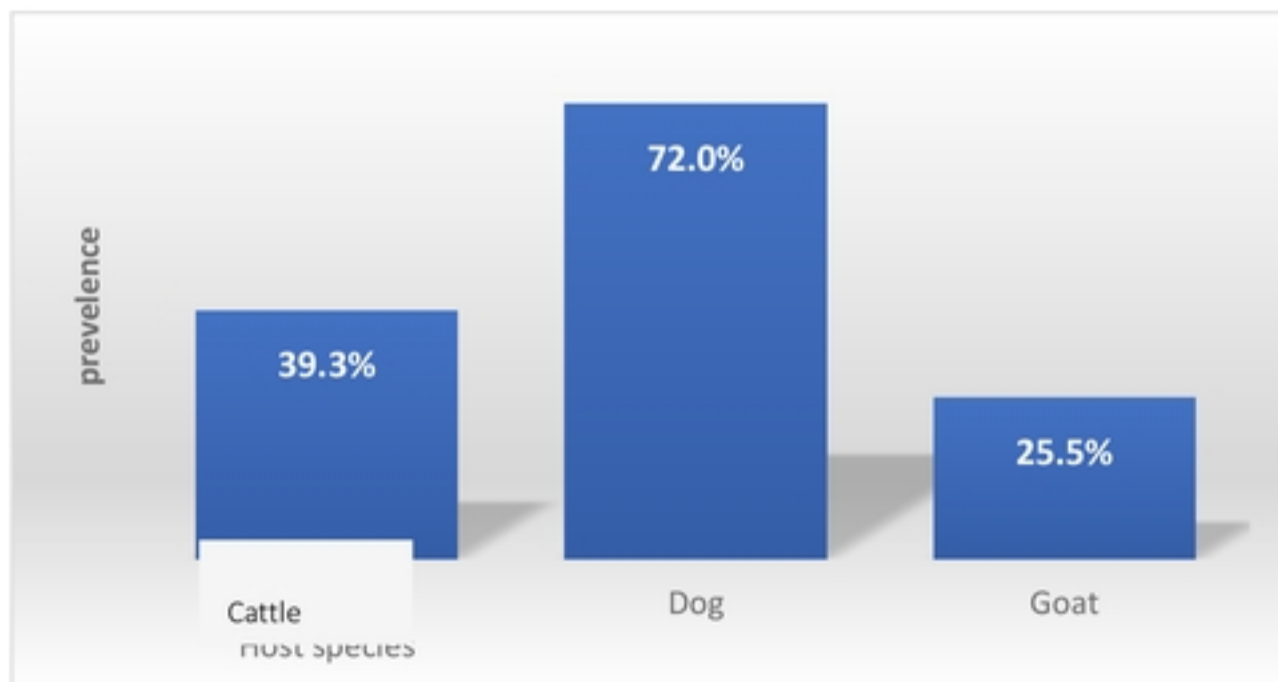

Source: https://medrxiv.org/content/10.1101/2023.02.27.23286549.full.pdf
